# Supplementary material
Source: PubMed Central journal article supplement (PMC11028491)
Supplement: 262_2015_1780_MOESM1_ESM.pdf [file 262_2015_1780_MOESM1_ESM.pdf]

**Supplementary Table 1. Univariate and multivariate analysis of prognostic factors of overall survival: a subgroup analysis of patients with intrahepatic cholangiocarcinoma**

| Variable                                      | n   | Univariate Analysis |                | Multivariate Analysis |                |
|-----------------------------------------------|-----|---------------------|----------------|-----------------------|----------------|
|                                               |     | HR (95% CI)         | P-value        | HR (95% CI)           | P-value        |
| Age                                           |     |                     |                |                       |                |
| < 65                                          | 73  | 1.00                |                |                       |                |
| ≥ 65                                          | 51  | 1.25 (0.86-1.82)    | 0.240          |                       |                |
| Sex                                           |     |                     |                |                       |                |
| Male                                          | 91  | 1.00                |                |                       |                |
| Female                                        | 33  | 1.06 (0.69-1.61)    | 0.802          |                       |                |
| Obesity <sup>a</sup>                          |     |                     |                |                       |                |
| No                                            | 93  | 1.00                |                |                       |                |
| Yes                                           | 31  | 1.08 (0.71-1.64)    | 0.718          |                       |                |
| Charlson comorbidity index score              |     |                     |                |                       |                |
| <3                                            | 76  | 1.00                |                |                       |                |
| ≥3                                            | 48  | 1.32 (0.90-1.92)    | 0.155          |                       |                |
| ECOG Performance status                       |     |                     | 0.574          |                       |                |
| 0                                             | 20  | 1.00                |                |                       |                |
| 1                                             | 95  | 1.30 (0.78-2.17)    | 0.313          |                       |                |
| 2                                             | 9   | 1.39 (0.62-3.10)    | 0.429          |                       |                |
| Total bilirubin, mg/dL                        |     |                     |                |                       |                |
| ≤ 1.5                                         | 107 | 1.00                |                |                       |                |
| > 1.5                                         | 17  | 1.03 (0.61-1.72)    | 0.918          |                       |                |
| Carbohydrate antigen 19-9                     |     |                     |                |                       |                |
| ≤ 300                                         | 59  | 1.00                |                |                       |                |
| > 300                                         | 65  | 1.18 (0.82-1.71)    | 0.374          |                       |                |
| Carcinoembryonic antigen                      |     |                     |                |                       |                |
| ≤ 5                                           | 80  | 1.00                |                |                       |                |
| > 5                                           | 44  | 1.27 (0.86-1.85)    | 0.226          |                       |                |
| Prothrombin time, %                           |     |                     |                |                       |                |
| ≥ 80                                          | 107 | 1.00                |                |                       |                |
| < 80                                          | 17  | 1.68 (0.997-2.83)   | 0.051          |                       |                |
| C-reactive protein, mg/dL                     |     |                     |                |                       |                |
| ≤ 2.5                                         | 58  | 1.00                |                |                       |                |
| > 2.5                                         | 66  | 1.30 (0.90-1.87)    | 0.164          |                       |                |
| Stage <sup>b</sup> of cholangiocarcinoma      |     |                     |                |                       |                |
| III                                           | 16  | 1.00                |                |                       |                |
| IV                                            | 108 | 0.82 (0.48-1.42)    | 0.479          |                       |                |
| Disease status                                |     |                     |                |                       |                |
| Locally advanced                              | 25  | 1.00                |                |                       |                |
| Metastatic                                    | 99  | 0.87 (0.55-1.36)    | 0.534          |                       |                |
| Chemotherapy regimen                          |     |                     |                |                       |                |
| Gemcitabine-based                             | 97  | 1.00                |                |                       |                |
| 5-fluorouracil-based                          | 27  | 1.03 (0.67-1.59)    | 0.896          |                       |                |
| Neutrophil-lymphocyte ratio                   |     |                     |                |                       |                |
| ≤ 5                                           | 88  | 1.00                |                | 1.00                  |                |
| > 5                                           | 36  | 2.28 (1.50-3.46)    | < <b>0.001</b> | 1.97 (1.30-2.99)      | <b>0.002</b>   |
| Cholecystitis / cholangitis                   |     |                     |                |                       |                |
| No                                            | 113 | 1.00                |                |                       |                |
| Yes                                           | 11  | 1.18 (0.63-2.21)    | 0.602          |                       |                |
| Biliary decompression                         |     |                     |                |                       |                |
| No                                            | 77  | 1.00                |                |                       |                |
| Yes                                           | 47  | 1.20 (0.82-1.75)    | 0.340          |                       |                |
| Number of cycles of chemotherapy <sup>c</sup> |     | 0.87 (0.83-0.91)    | < <b>0.001</b> | 0.87 (0.83-0.92)      | < <b>0.001</b> |

<sup>a</sup>Obesity was defined as a body mass index > 25 kg/m<sup>2</sup> according to the Asian-Pacific criteria for obesity.

<sup>b</sup>All tumors were staged according to the 7<sup>th</sup> edition of American Joint Committee on Cancer (AJCC) Classification System.

<sup>c</sup>continuously coded

ECOG, Eastern Cooperative Oncology Group; HR, hazard ratio; CI, confidence interval.

**Supplementary Table 2. Univariate and multivariate survival analysis of possible prognostic factors including derived neutrophil-lymphocyte ratio**

| Variable                                      | n   | Univariate Analysis |                   | Multivariate Analysis |                   |
|-----------------------------------------------|-----|---------------------|-------------------|-----------------------|-------------------|
|                                               |     | HR (95% CI)         | P-value           | HR (95% CI)           | P-value           |
| Age                                           |     |                     |                   |                       |                   |
| < 65                                          | 128 | 1.00                |                   |                       |                   |
| ≥ 65                                          | 93  | 1.12 (0.84-1.49)    | 0.435             |                       |                   |
| Sex                                           |     |                     |                   |                       |                   |
| Male                                          | 153 | 1.00                |                   |                       |                   |
| Female                                        | 68  | 1.06 (0.78-1.44)    | 0.706             |                       |                   |
| Obesity                                       |     |                     |                   |                       |                   |
| No                                            | 165 | 1.00                |                   |                       |                   |
| Yes                                           | 56  | 1.10 (0.80-1.51)    | 0.579             |                       |                   |
| Charlson comorbidity index score              |     |                     |                   |                       |                   |
| <3                                            | 133 | 1.00                |                   |                       |                   |
| ≥3                                            | 88  | 1.03 (0.77-1.37)    | 0.887             |                       |                   |
| ECOG Performance status                       |     |                     |                   |                       |                   |
| 0                                             | 38  | 1.00                |                   |                       |                   |
| 1                                             | 168 | 1.39 (0.95-2.03)    | 0.090             |                       |                   |
| 2                                             | 15  | 1.32 (0.71-2.47)    | 0.384             |                       |                   |
| Total bilirubin, mg/dL                        |     |                     |                   |                       |                   |
| ≤ 1.5                                         | 179 | 1.00                |                   |                       |                   |
| > 1.5                                         | 42  | 0.91 (0.64-1.30)    | 0.617             |                       |                   |
| Carbohydrate antigen 19-9                     |     |                     |                   |                       |                   |
| ≤ 300                                         | 110 | 1.00                |                   | 1.00                  |                   |
| > 300                                         | 111 | 1.57 (1.18-2.09)    | <b>0.002</b>      | 1.50 (1.11-2.03)      | <b>0.008</b>      |
| Carcinoembryonic antigen                      |     |                     |                   |                       |                   |
| ≤ 5                                           | 146 | 1.00                |                   |                       |                   |
| > 5                                           | 75  | 1.39 (1.03-1.86)    | <b>0.030</b>      |                       |                   |
| Prothrombin time, %                           |     |                     |                   |                       |                   |
| ≥ 80                                          | 190 | 1.00                |                   |                       |                   |
| < 80                                          | 31  | 1.30 (0.88-1.94)    | 0.190             |                       |                   |
| C-reactive protein, mg/dL                     |     |                     |                   |                       |                   |
| ≤ 2.5                                         | 114 | 1.00                |                   |                       |                   |
| > 2.5                                         | 107 | 1.38 (1.05-1.83)    | <b>0.023</b>      |                       |                   |
| Location of tumor                             |     |                     |                   |                       |                   |
| Distal                                        | 26  | 1.00                |                   |                       |                   |
| Perihilar                                     | 71  | 1.35 (0.81-2.24)    | 0.256             |                       |                   |
| Intrahepatic                                  | 124 | 2.13 (1.32-3.45)    | <b>0.002</b>      |                       |                   |
| Stage of cholangiocarcinoma                   |     |                     |                   |                       |                   |
| III                                           | 56  | 1.00                |                   | 1.00                  |                   |
| IV                                            | 165 | 1.35 (0.97-1.89)    | 0.079             | 1.78 (1.24-2.53)      | <b>0.002</b>      |
| Disease status                                |     |                     |                   |                       |                   |
| Locally advanced                              | 84  | 1.00                |                   |                       |                   |
| Metastatic                                    | 137 | 1.51 (1.12-2.02)    | <b>0.007</b>      |                       |                   |
| Chemotherapy regimen                          |     |                     |                   |                       |                   |
| Gemcitabine-based                             | 179 | 1.00                |                   |                       |                   |
| 5-fluorouracil-based                          | 42  | 1.30 (0.93-1.84)    | 0.130             |                       |                   |
| Derived neutrophil-lymphocyte ratio           |     |                     |                   |                       |                   |
| ≤ 2                                           | 116 | 1.00                |                   | 1.00                  |                   |
| > 2                                           | 105 | 1.55 (1.17-2.05)    | <b>0.002</b>      | 1.44 (1.07-1.93)      | <b>0.016</b>      |
| Cholecystitis / cholangitis                   |     |                     |                   |                       |                   |
| No                                            | 192 | 1.00                |                   |                       |                   |
| Yes                                           | 29  | 0.93 (0.61-1.42)    | 0.750             |                       |                   |
| Biliary decompression                         |     |                     |                   |                       |                   |
| No                                            | 102 | 1.00                |                   |                       |                   |
| Yes                                           | 119 | 0.78 (0.59-1.03)    | 0.083             |                       |                   |
| Number of cycles of chemotherapy <sup>a</sup> |     | 0.88 (0.85-0.91)    | <b>&lt; 0.001</b> | 0.87 (0.83-0.89)      | <b>&lt; 0.001</b> |

<sup>a</sup>continuously coded

ECOG, Eastern Cooperative Oncology Group; HR, hazard ratio; CI, confidence interval.
